## **Damage-induced reactive oxygen species enable zebrafish tail regeneration by repositioning of Hedgehog expressing cells**

Maria Montserrat Garcia Romero<sup>1§</sup>, Gareth McCathie<sup>1§</sup>, Philip Jankun<sup>1</sup>  
and Henry Hamilton Roehl<sup>1</sup><sup>‡</sup>

<sup>1</sup>Bateson Centre  
Department of Biomedical Sciences  
The University of Sheffield  
Firth Court, Western Bank  
Sheffield S10 2TN  
United Kingdom

<sup>§</sup> These authors contributed equally

<sup>‡</sup> Corresponding author (h.roehl@sheffield.ac.uk)

## 1 Abstract

2 **Aquatic vertebrates have a remarkable ability to regenerate limbs and tails after**  
3 **amputation. Previous studies indicate that reactive oxygen species (ROS) signalling**  
4 **initiates regeneration, but the mechanism by which this takes place is poorly**  
5 **understood. Developmental signalling pathways have been shown to have pro-**  
6 **regenerative roles in many systems. However, whether these are playing roles that**  
7 **are specific to regeneration, or are simply recapitulating their developmental**  
8 **functions is unclear. We have analysed zebrafish larval tail regeneration and find**  
9 **evidence that ROS released upon wounding cause repositioning of notochord cells to**  
10 **the damage site. These cells secrete Hedgehog ligands which are required for**  
11 **regeneration. Hedgehog signalling is not required for normal tail development**  
12 **suggesting that it has a regeneration specific role. Our results provide a model for**  
13 **how ROS initiate tail regeneration, and indicate that developmental signalling**  
14 **pathways can play regenerative functions that are not directly related to their**  
15 **developmental roles.**

## 16 Introduction

17  
18 The study of regenerative biology aims to understand the mechanisms and limitations of  
19 endogenous regenerative capacity. During vertebrate appendage regeneration in  
20 salamander limb, mouse digit, and *Xenopus* tadpole tail and zebrafish fin, a conserved  
21 sequence of events takes place after tissue is removed<sup>1,2</sup>. Immediately following tissue  
22 damage the wound is closed by active movement of the surrounding epithelia. Next, the  
23 epithelial covering of the wound thickens to form what is called the wound epithelia and  
24 cells migrate under the wound epithelia to form a tightly packed mass proliferative cells  
25 called the blastema. During the final phase of regeneration the blastemal cells and the  
26 wound epithelium proliferate and differentiate to give rise to the missing tissue.

27  
28 How wounding initiates regeneration is a central question in regenerative biology. Tissue  
29 damage results in the immediate release of signals such as calcium, ATP, and reactive  
30 oxygen species (ROS) which act to stimulate wound closure and the immune response  
31 thus limiting detrimental effects of injury<sup>3</sup>. Of these initial signals, ROS stand out as a  
32 good candidate for the activation of regeneration. Upon wounding, calcium release results  
33 in a rapid burst of ROS that is likely to involve Duox, a NADPH Oxidase<sup>3</sup>. Then ROS,  
34 primarily in the relatively stable form of hydrogen peroxide, are thought to diffuse into  
35 the neighbouring tissue to act as a paracrine signal (referred to as ROS signalling). ROS  
36 exert their effects through the reversible oxidation of cysteine residues in key regulatory  
37 proteins<sup>4</sup>. Although precisely how ROS signalling is able to confer specific cellular  
38 responses is still poorly understood, studies focused upon the MAPK and Wnt pathways  
39 suggest that ROS levels may serve to modulate the activity of diverse signalling  
40 pathways<sup>5,6</sup>. These studies indicate that members of the thioredoxin family of redox  
41 sensors bind signalling pathway components in a ROS dependent manner.

42  
43 The importance of ROS signalling to vertebrate regenerative biology has only recently  
44 become apparent. Research on zebrafish larvae has shown that ROS are required for

45 axonal regeneration<sup>7</sup> and that ROS acts via a Src Family Kinase (SFK) to promote  
46 regeneration of the fin fold<sup>8</sup>. Other zebrafish studies have shown that adult heart and fin  
47 require ROS to regrow after wounding<sup>9,10</sup>. ROS have also been shown to act during  
48 *Xenopus* tadpole regeneration<sup>11</sup>. Thus ROS signalling may act more generally as signal  
49 that serves to both coordinate the damage response and to initiate the regeneration  
50 program.

51  
52 Another crucial question is how the regeneration of an organ differs from the initial  
53 development of that organ<sup>12,13</sup>. For example, the mesenchyme of the developing limb bud  
54 resembles the blastema of the amputated limb in both morphology and its expression of  
55 *msx* genes. Similarly, the apical ectodermal ridge of the limb bud resembles the wound  
56 epithelium and both structures express *dlx* genes. This suggests that once these structures  
57 have appeared, regeneration follows the previously established developmental program.  
58 Developmental signalling pathways such as Wnt/ $\beta$ -Catenin, FGF, Hedgehog, Retinoic  
59 Acid (RA), Notch and BMP have been shown to play important roles during regeneration.  
60 We must therefore ask whether the regenerative roles of these pathways are unique to  
61 regeneration or are simply a recapitulation of earlier developmental roles.

62  
63 To shed light on these questions, we have analysed how developmental pathways direct  
64 zebrafish larval tail regeneration. Here we provide evidence that Hedgehog signalling is a  
65 key regulator of tail regeneration, acting upstream of the Wnt/ $\beta$ -Catenin, FGF and RA  
66 signalling pathways. This finding is surprising given that Hedgehog signalling does not  
67 play a role in tail development. In addition, we propose that the source of the regenerative  
68 Hedgehog signal is notochord cells that are rapidly repositioned to the stump immediately  
69 following wounding. Our data suggest that this movement is dependent upon release of  
70 ROS from the wound site and requires SFK activity and microtubule polymerisation.  
71 Together these data suggest a model that ROS signalling initiates tail regeneration by  
72 relocating Hedgehog expressing notochord cells to the wound site.

73

## 74 **Results**

75

### 76 *Overview of tail regeneration.*

77 Regeneration in zebrafish larvae has been studied in two contexts: fin fold excision and  
78 tail excision<sup>14-17</sup>. During fin fold excision, tissue removal is limited to epithelium and fin  
79 mesenchymal cells in the caudal region of the tail (Supplementary Figure 1a). On the  
80 other hand, tail excision involves partial removal of neural tube, notochord, muscle,  
81 pigment cells, blood vessels as well as the caudal fin fold (Supplementary Figure 1a).  
82 Within minutes after tail excision notochord cells move out of the notochord sheath to  
83 give rise to a cluster of cells (the "notochord bead") that sit on the stump of the tail  
84 (Supplementary Movie 1). Formation of the notochord bead appears to be caused by  
85 contraction of the anterior/posterior body axis resulting in pressure build up in the  
86 notochord (Supplementary Figure 2). To determine the timing of regeneration after tail  
87 excision we examined the expression markers of the different stages during regeneration  
88 (Supplementary Figure 1b). By 24 hours post excision (hpe), *dlx5a* expression marks the  
89 forming wound epithelium, and by 48hpe the blastema is marked by strong expression of  
90 *msxc*. A previous study of fin fold regeneration found that the early blastema is marked

91 by the RA synthesis gene *raldh2* and that RA signalling is required for regeneration<sup>18</sup>.  
92 Consistent with this, we found that *raldh2* is upregulated in the forming blastema at  
93 24hpe. Increased expression of the muscle differentiation gene *myod* is seen between 48  
94 and 81hpe suggesting that regrowth takes place during this interval. Although these genes  
95 are expressed during tail development, they are not detected immediately prior to  
96 excision (Supplementary Figure 1b). This indicates that tail excision reactivates  
97 expression of these genes. If operated fish are raised past larval development, they appear  
98 morphologically normal. However, skeletal visualisation reveals that the internal  
99 structure of the tail is modified perhaps due to a defect in notochord extension  
100 (Supplementary Figure 1c).

101  
102 *Developmental signalling pathways.*

103 To begin to understand how developmental signalling coordinates regeneration, we first  
104 focused on the FGF pathway to identify ligands and downstream targets that are induced  
105 by tissue removal. Similar to previous studies that identified *fgf20a* as a damage-induced  
106 ligand in the fin fold<sup>19</sup>, we found that *fgf10a* transcripts are upregulated at 24hpe in cells  
107 adjacent to the extruded notochord bead (Fig. 1a). We also found that the target gene  
108 *pea3* is induced in the surrounding cells, indicating that these cells are responding to FGF  
109 signalling at this time (Fig. 1a). Neither gene is expressed strongly in unoperated tails at  
110 this time (Supplementary Figure 3a, b). The allele *tbvbo* encodes a null mutation in  
111 *fgf10a* that does not have a discernable effect on normal tail development (Supplementary  
112 Figure 4)<sup>20</sup>. Consistent with a role for FGF signalling in larval tail regeneration we found  
113 that *fgf10a*<sup>-/-</sup> larvae have reduced regenerative capacity (Fig. 1b). To determine whether  
114 the wound epithelium and blastema form properly, we tested levels of expression of  
115 *dlx5a* and *raldh2* in *fgf10a*<sup>-/-</sup> larvae and in fish treated with the FGF receptor inhibitor  
116 SU5402<sup>21</sup>. Both conditions do not show an observable difference in expression  
117 suggesting that FGF signalling does not play a role in the initial patterning of the  
118 regenerating tail (Fig. 1c). A previous study found that FGF signalling is required for  
119 regeneration specific proliferation in the fin fold<sup>15</sup>, and similarly we found that the  
120 number of proliferating cells in *fgf10a*<sup>-/-</sup> larvae is reduced compared to wild-type fish (Fig.  
121 1d). These results suggest that FGF signalling is required for damage-induced  
122 proliferation after tail excision.

123  
124 We next investigated the role of Wnt/ $\beta$ -Catenin signalling during tail regeneration by  
125 screening for Wnt genes that are activated after excision. We found that *wnt10a* is  
126 upregulated starting at 18hpe in cells neighbouring the notochord bead and the Wnt/ $\beta$ -  
127 Catenin downstream target gene *pcf7* is upregulated also in this region (Fig. 2a). Neither  
128 gene is expressed strongly in unoperated tails at this time (Supplementary Figure 3c, d).  
129 To further investigate we used the Wnt/ $\beta$ -Catenin pathway inhibitor IWR-1<sup>22</sup> to turn off  
130 signalling following excision. Treatment with IWR-1 results in the absence of tail  
131 regrowth suggesting that Wnt/ $\beta$ -Catenin signalling is required for regeneration (Fig. 2b).  
132 To determine whether *dlx5a* or *raldh2* expression depend upon the Wnt/ $\beta$ -Catenin  
133 pathway, we used a heatshock inducible *dickkopf-1b* transgene (*hsp70l:dkk1b-GFP*)<sup>23</sup> to  
134 inhibit signalling and a glycogen synthase kinase antagonist (GskXV) to activate  
135 signalling<sup>24</sup>. We found that whereas inhibition abolishes expression of both genes,  
136 pathway activation leads to expansion of the expression domains of *dlx5a* and *raldh2* (Fig.

137 2c). Since both FGF and Wnt/ $\beta$ -Catenin pathways appear to act at the same time (24-  
138 48hpe), we wondered whether they might regulate each other's activity. By manipulation  
139 of both pathways we found that each pathway has a positive effect on the other pathway's  
140 activity (Fig. 2d, e). These data indicate that Wnt/ $\beta$ -Catenin signalling patterns the early  
141 regenerating tail and interacts with FGF signalling.  
142

143 The third developmental pathway that we have investigated is the Hedgehog signalling  
144 pathway. We first tested whether the Hedgehog pathway influences regeneration using  
145 the inhibitor cyclopamine<sup>25</sup> (Fig. 3a, b). Cyclopamine treatment following tail excision  
146 results in loss of regeneration and loss of *dlx5a* and *msxc* expression. Consistent with an  
147 early role for Hedgehog signalling we found that treatment from -12hpe to 12hpe is  
148 sufficient to block regeneration. To control for off-target effects of the cyclopamine  
149 treatment, we used another Hedgehog pathway inhibitor, LDE225<sup>26</sup>, and obtained similar  
150 results (Fig. 3a, b). To determine how Hedgehog signalling controls regeneration, we  
151 tested for expression of Wnt, FGF and RA genes after cyclopamine treatment and found  
152 that their expression is abolished (Fig. 3c). Consistent with Hedgehog signalling acting  
153 upstream of FGF signalling we found that cyclopamine treatment strongly reduces  
154 proliferation after tail excision (Fig. 3d). Given the early timing of the Hedgehog  
155 signalling requirement, it is possible that this pathway acts upstream of the other  
156 developmental pathways. To test this, we performed chemical epistasis by treating  
157 regenerating fish with cyclopamine to block the Hedgehog pathway while activating the  
158 Wnt/ $\beta$ -Catenin pathway with GskXV. We found that GskXV treatment is sufficient to  
159 restore expression of the regeneration markers *dlx5a*, *msxc* and *raldh2* indicating that the  
160 Hedgehog and Wnt/ $\beta$ -Catenin pathways form a linear pathway (Fig. 3e). Together these  
161 data present a model that the Hedgehog pathway plays a key role during regeneration by  
162 activating the Wnt/ $\beta$ -Catenin, FGF and RA pathways.  
163

164 To determine the source and timing of Hedgehog signalling, we looked at expression of  
165 Hedgehog ligands as well as the downstream target *patched1* (*ptch1*). We found that two  
166 Hedgehog ligands (*sonic hedgehog a*, *shha* and *indian hedgehog b*, *ihhb*) are strongly  
167 expressed in the notochord bead (Fig. 4a and Supplementary Figure 5a). Although this  
168 expression appears to be limited to the cells in the bead, this restricted detection is an  
169 artefact of the wholemount in situ hybridisation method: When fixed larvae are cut along  
170 the coronal axis or obliquely to reveal the notochord prior to hybridisation, then  
171 expression of *ihhb* is detected in the notochord before and after excision (Fig. 4b). This  
172 artefact is likely to be because notochord sheath cells deposit a dense extracellular matrix  
173 that may restrict penetration of components during in situ hybridisation. Consistent with  
174 this model, we found that there is a low level of expression of *ptch1* around the caudal tip  
175 of the notochord prior to excision (Supplementary Figure 3f), and high level expression  
176 after the notochord bead has formed (Supplementary Figure 5a). To further test whether  
177 Hedgehog signalling acts upstream of other developmental pathways, we looked to see  
178 whether manipulation of any of these pathways affects the wound-induced expression of  
179 *ptch1* and found that none of the treatments alter its expression (Supplementary Figure  
180 5b). Together these data suggest the model that formation of the notochord bead provides  
181 for a new source of Hedgehog signalling that acts upstream of other developmental  
182 pathways.

183

184 In the fin fold excision model of regeneration, the notochord is not injured suggesting that  
185 the initiation of regeneration may take place by a mechanism that does not rely upon the  
186 notochord bead and Hedgehog signalling. To test this we treated fish with cyclopamine  
187 after fin fold excision. We found a mild effect in that the fin fold regenerates at a slower  
188 rate when Hedgehog signalling is blocked (Supplementary Figure 6a). Consistent with  
189 this we do not detect upregulation of *ihhb* or *ptch1* after fin fold excision (Supplementary  
190 Figure 6b). Although these results suggest that the Hedgehog pathway may act during fin  
191 fold regeneration, they indicate that it is unlikely to play the same crucial role that it does  
192 during tail regeneration.

193

194 *ROS activate Hedgehog signalling during tail regeneration.*

195 Given that ROS signalling has been proposed to activate regeneration in different models,  
196 it is possible that ROS initiate larval tail regeneration upstream of Hedgehog signalling.  
197 High levels of ROS are synthesized in cells along the edge of the stump starting  
198 immediately after excision (Fig. 5a). To begin to test the role of ROS we blocked their  
199 generation with the flavoenzyme inhibitor diphenylene iodonium (DPI) which inhibits  
200 NADPH oxidases<sup>3</sup>. Treatment with 150µM DPI from 1 hour prior to excision until 1hpe  
201 is sufficient to reduce regeneration by 50% (Fig. 5b, c) and strongly reduces wound-  
202 induced ROS levels (Fig. 5a, d). DPI may affect other signalling pathways besides ROS  
203 that involve flavoenzymes or indeed may have unrelated off-target effects<sup>27</sup>. To control  
204 for these potential effects of the DPI treatment, we utilised the ROS scavenger MCI186<sup>11</sup>  
205 which also reduces ROS levels and regenerated tail length (Fig. 5d, e). The effect of MCI  
206 186 is milder than that of DPI but increasing levels of MCI 186 results in toxicity, so we  
207 kept the levels of MCI 186 below this threshold. Consistent with ROS signalling  
208 activating regeneration upstream of the Hedgehog pathway, we found that wound-  
209 induced expression of *ptch1*, *raldh2*, *tcf7* and *pea3* is reduced following DPI treatment  
210 (Fig. 5f).

211

212 We next sought to determine whether ROS signalling potentially regulates regeneration  
213 by promoting the formation of the notochord bead. When we measured the size of the  
214 notochord bead at 4hpe, we found that DPI treatment reduces bead formation, but that  
215 MCI treatment does not (Fig. 6a). As SFKs have been proposed to act downstream of  
216 ROS signalling during fin fold regeneration, we tested whether the SFK inhibitor PP2<sup>28</sup>  
217 influences bead size. We also used nocodazole which interferes with microtubule  
218 polymerisation in an attempt to block bead formation by an independent mechanism. We  
219 found that both compounds have a strong effect on bead formation (Fig. 6a). To assess  
220 how these inhibitors affect wound-induced activation of Hedgehog pathway, we analysed  
221 levels of *ptch1* and *ihhb* expression. We found that these compounds reduce the amount  
222 of *ihhb* transcripts in the notochord bead (Fig. 6b, c) and reduce *ptch1* to levels similar to  
223 those seen with DPI treatment (Supplementary Figure 7). Although nocodazole treatment  
224 would also be predicted to affect ciliogenesis and thus Hedgehog signal transduction, the  
225 observation that treatment blocks bead formation and Hedgehog ligand presentation  
226 suggest that nocodazole exerts its effect upstream of ciliogenesis. Interestingly, DPI  
227 treatment can result in the loss of *ihhb* expression even when the bead is fully extruded  
228 suggesting that a burst of ROS production may be required for both notochord extrusion

229 and expression of *ihhb* in the notochord bead (Supplementary Figure 8). Together these  
230 data suggest that ROS/SFK dependent bead formation is a necessary step in the  
231 regeneration of the tail.

232  
233 To further control for potential unintended effects of chemical treatments we decided to  
234 test whether we could rescue DPI and PP2 treatment by activating Wnt/ $\beta$ -Catenin  
235 signalling as we have done for cyclopamine treatments (Fig. 3e). We treated fish at the  
236 time of excision with either DPI or PP2 to inhibit bead formation, allowed the fish to  
237 recover and then the next day activated WNT/ $\beta$ -Catenin signalling with GskXV. Rescue  
238 was quantified by measuring the area of *raldh2* expression after RNA in situ analysis.  
239 Both DPI and PP2 treated fish show a significant level of recovery of *raldh2* expression  
240 after treatment with GskXV (Supplementary Figure 9). This experiment suggests that the  
241 effects of DPI and PP2 are not simply due to toxic off-target effects and support the  
242 hypothesis that ROS and SFKs act upstream of Wnt/ $\beta$ -Catenin signalling. However,  
243 given the limitations of chemical inhibition specificity, these treatments should be  
244 interpreted with caution and further analysis of ROS signalling is needed to confirm its  
245 role in regeneration.

246  
247 Having found that DPI and PP2 both strongly reduce notochord bead extrusion, we  
248 decided to test whether these compounds affect early cell shape changes seen directly  
249 after tail excision (Supplementary Movie 1). Within the first few minutes after excision  
250 there is a change in the curvature of the cell membranes which initially bow towards the  
251 anterior, then change to bow towards the posterior (Supplementary Figure 2). This  
252 change suggests that these cells are passively being forced towards the open end of the  
253 notochord perhaps due to increased pressure within the notochord. To quantify this  
254 change we chose to measure the Menger curvature which is the inverse of the radius of a  
255 circle that approximates the curved arc of the cell membrane. A cell membrane that runs  
256 perpendicular to the notochord sheath will result in a Menger curvature of 0, one bowed  
257 to the posterior results in a positive value and one bowed to the anterior a negative value.  
258 We measured changes in notochord cell curvature during the first 20 minutes after  
259 excision and found that while control fish show a dramatic change in curvature, those  
260 treated with DPI or PP2 resemble uncut fish (Supplementary Figure 10).

261  
262 A second early morphological change after tail excision is contraction of the trunk along  
263 the anterior/posterior axis (Supplementary Movie 1). Contraction along this axis could  
264 result in increased pressure within the notochord that may result in expulsion of cells  
265 from the open end of notochord. We measured trunk length of individual animals before  
266 excision and then measured the same animal again at 2hpe (Supplementary Figure 11).  
267 We found that whereas untreated fish contract by an average of 4.4%, DPI and PP2 only  
268 contract by 1.7% and 1.2% respectively. Taken together these data suggest that ROS/SFK  
269 signalling is required for early cell movements immediately following tail excision.

270  
271 *ROS and Hedgehog signalling do not have similar roles during tail development.*

272 Given the complex signalling interactions that take place during regeneration, we  
273 wondered whether these interactions are also required during normal tail development.  
274 Although interactions between the FGF, Wnt/ $\beta$ -Catenin and RA pathways are crucial for

275 tail formation in chick, mouse and zebrafish<sup>29-32</sup>, roles for ROS and Hedgehog signalling  
276 have not been described. To test whether ROS act during tail development, we treated  
277 larvae with DPI during axis elongation and found that morphologically tails are  
278 unaffected by this treatment (Fig. 7a). Likewise, expression of Hedgehog ligands is not  
279 affected by DPI treatment during tail development (Fig. 7b). To functionally test whether  
280 Hedgehog signalling acts on the tail bud, we treated fish with cyclopamine and found that  
281 blocking Hedgehog signalling does not affect *raldh2* or *tcf7* levels (Fig. 7c). Consistent  
282 with this, we found that cyclopamine treated fish have relatively normal tail development  
283 except for the formation of U-shaped somites due to a known function of Hedgehog  
284 signalling in somite patterning (Fig. 7d)<sup>25</sup>. Furthermore, fish carrying null mutations in  
285 the Hedgehog receptor gene *smoothened* (*smo*<sup>b577</sup>)<sup>33</sup> form a tail, but lack Hedgehog  
286 signalling (Fig 7d). *smoothened* is absolutely required for Hedgehog signalling as it has  
287 no paralogs and there is no evidence for its redundancy with other genes. The possibility  
288 that low levels of maternal Smoothened activity may play a role in tail development is  
289 very unlikely as maternal-zygotic *smoothened* mutants form a tail<sup>34</sup>. These data indicate  
290 that proposed regulatory interactions mediated by ROS and Hedgehog do not act during  
291 normal tail development and have specific functions during tail regeneration.

292

## 293 Discussion

294

295 In the course of this study, we have uncovered a mechanism by which damage-induced  
296 ROS signalling may initiate regeneration (Fig. 7). Our model does not exclude the  
297 involvement of other signals such as TGF $\beta$ , EGF (Epidermal Growth Factor), hypoxia  
298 and non-canonical WNT signalling which are also likely to play roles in larval tail  
299 regeneration<sup>14, 23, 35, 36</sup>. Rather this model is intended to provide a framework for future  
300 analysis of larval tail regeneration in fish. Surprisingly our data suggest that ROS  
301 influence regeneration by causing the rapid repositioning of Hedgehog-expressing  
302 notochord cells to the site of the wound. Prior to injury, notochord cells express  
303 Hedgehog ligands but this expression has little or no direct effect on cells neighbouring  
304 the notochord as judged by expression of *ptch1*. Once the sheath is breached and  
305 notochord cells are extruded to form a bead, high levels of Hedgehog ligands signal to the  
306 surrounding tissue. Another surprising result is that although Hedgehog signalling is  
307 required for tail regeneration, it is dispensable for tail development. Thus the Hedgehog  
308 pathway plays a regeneration-specific role in this context and acts as a relay between the  
309 immediate damage response and the expression of signalling pathways known to  
310 coordinate both development and redevelopment of the tail.

311

312 The important role played by the notochord extrusion and Hedgehog pathway activation  
313 in zebrafish larvae may be conserved during tail regeneration in other aquatic vertebrates  
314 such as frogs and salamanders. One study has shown that in *Xenopus* tadpoles a  
315 notochord bead forms at the stump within the first few hours of tail excision, and that  
316 these extruded notochord cells express Hedgehog ligands from 24-48hpe<sup>37</sup>. This study  
317 went on to show that tadpoles treated with cyclopamine immediately following tail  
318 excision have reduced regeneration. Another study has shown that ROS signalling is  
319 required for induction of FGF and Wnt/ $\beta$ -Catenin signalling at 36hpe<sup>11</sup>. Based upon this  
320 timing, it is possible that Hedgehog signalling from the notochord bead also acts to link



321 ROS signalling to redevelopment of the tadpole tail. The picture from axolotl is  
322 intriguing, as although Hedgehog signalling is important for axolotl tail regeneration, the  
323 expression of *Sonic hedgehog* is restricted to the floor plate of the neural tube<sup>38</sup>. It would  
324 be interesting if the Hedgehog pathway has maintained its role as a key regulator of tail  
325 regeneration in axolotl despite its expression being limited to the floor plate. In addition  
326 to its role in tail regeneration, Hedgehog ligands *shha*, *ihhb* and *desert hedgehog* have  
327 been shown to be upregulated during heart regeneration where they direct epicardial  
328 regeneration<sup>39</sup>, Hedgehog signalling activates Wnt/ $\beta$ -Catenin genes during newt limb  
329 regeneration<sup>40</sup> and regulates axon guidance during nerve regeneration<sup>41</sup>. As these tissues  
330 also require ROS production to regenerate, it will be interesting to test whether the  
331 Hedgehog pathway acts to link ROS signalling to redevelopment in these contexts.

332  
333 In our model of tail regeneration, we have placed the FGF, Wnt/ $\beta$ -Catenin and RA  
334 pathways in a "redevelopment" module because broadly speaking these pathways  
335 interact in a similar ways during development and regeneration (Figure 8). This makes  
336 sense because it is unlikely that organisms would evolve entirely new mechanisms to  
337 regrow tissue, when a pre-existing developmental module would suffice. However, this  
338 may be an oversimplification as there are some fundamental differences between the  
339 origins and movement of precursor cells during development and redevelopment.

340  
341 In contrast, Hedgehog signalling plays an unexpected role during tail regeneration,  
342 raising the question of how Hedgehog signalling has evolved to act upstream of the  
343 redevelopment module. If in nature larvae are often losing the end of their tails, then it is  
344 reasonable to suggest that Hedgehog regulation of the redevelopment module has evolved  
345 due to selective pressure. Alternatively, Hedgehog signalling may interact with FGF,  
346 Wnt/ $\beta$ -Catenin and RA pathways during another developmental process that is unrelated  
347 to tail regeneration. In this case its regulatory role could have evolved and be maintained  
348 by selection for this unrelated developmental process. This second model does not require  
349 selective pressure to evolve Hedgehog's regenerative role, and rather suggests that an  
350 existing developmental signalling network has been co-opted to serve during regeneration.

351  
352 A related question is how ROS/SFK signalling has evolved to regulate notochord  
353 extrusion. Here we propose that ROS cause contraction along the anterior/posterior axis  
354 which results a build-up of pressure within the trunk of the fish. Given that the notochord  
355 sheath forms a tube-like structure, compaction along the anterior/posterior axis could  
356 build up pressure and force notochord cells rapidly out of the open end. The driving force  
357 for contraction may be the mass movement of epithelial cells towards the stump that has  
358 been described after fin fold excision<sup>42</sup>. The molecular mechanism for notochord bead  
359 extrusion is likely to involve ROS signalling through SFKs as well as microtubule  
360 polymerisation. Further evidence for this mechanism comes from a range of models.  
361 Studies in *Xenopus* have shown that microtubule polymerisation is required for wound  
362 closure<sup>43</sup> and ROS have been shown to play a role in wound closure in *C.elegans*<sup>44</sup> and  
363 more recently in zebrafish<sup>45</sup>. *Yoo et al* have shown that the SFK Lyn acts as a receptor for  
364 ROS signalling<sup>28</sup> and several studies have suggested the model that SFKs directly  
365 phosphorylate microtubules to promote their polymerisation and/or stabilisation<sup>46-48</sup>. Thus,  
366 it is possible that the notochord bead results from ROS-dependent morphological changes

367 that pressurise the notochord forcing cells out of the open end. Once formed, the  
368 notochord bead then acts as a source of Hedgehog signalling to promote tail  
369 redevelopment.

## Methods

### General methods

Experimental procedures and fish maintenance were performed using standard methods<sup>49</sup>. All animal husbandry and experimentation was carried out under the supervision and approval of the Home Office (UK) and the University of Sheffield Ethics Board. Adult zebrafish were maintained with a 14 h light/10 h dark cycle at 28°C according to standard protocols and were mated using pair mating in individual cross tanks. For more information on how individual experiments were performed, please refer to the figure legends and the sections below. The strains used in this study are *hsp70l:dkk1b-GFP*<sup>23</sup>, *fgf10a<sup>tbvbo</sup>*<sup>20</sup>, *smoothened<sup>b577</sup>*<sup>33</sup>. All images were taken with anterior to the left and dorsal up.

### Chemical treatment

All chemical treatments in this study were done in embryo media (E3) at 28.5°C unless otherwise stated. Control fish were treated with the appropriate solvent. IWR-1 (I0161, Sigma), LDE225 (S2151, Selleckchem), GskXV (361558, Merck), SU5402 (572630, Merck), nocodazole (1228, Tocris Bioscience), DPI (D2926, Sigma) were dissolved in DMSO prior to use. Ethanol was used to solubilize cyclopamine (C4116, Sigma). MCI186 (443300, Merck) was dissolved directly in E3 immediately before use.

### Tail Excision

Fish were anaesthetised in 40µg/ml Tricaine (3-amino benzoic acid ethylester) in E3. A scalpel was used to remove the end of the tail using the pigment gap as a reference (Supplementary Figure 12). For short-term treatments (4hpe or less) larvae remained in tricaine.

### Statistics and animal numbers

Statistical analysis and the numbers of animals used is reported in the figure legends. To report in situ expression patterns, a representative animal is shown in the figure panel. To score the consistency of the expression, the number of animals in the panel is indicated by a fraction. For example, if the panel shows a lack of expression and the fraction is 9/10, this indicates that nine out of ten animals in that experimental group lacked expression. For experiments that were quantified, graphs were generated and analysed in Prism 7 software. Error bars indicate the 95% confidence interval and the centre bar represents the mean. Individual circles represent individual animal tested. The figure legends indicate the type of statistical test applied, the P values and the number of animals per sample (n = ). The number of times the experiment was performed is indicated.

### Image analysis

Images were blinded before analysis using the macro entitled "Renaming images for blind analysis" available as Supplementary Software 1. This macro takes a folder of images and duplicates every image renaming it with a random code. The duplicated images are stored in a separate folder and a table is saved that serves as a key to reveal which number corresponds to which original image. If possible, images are captured so as not to reveal the experimental group. For example *fgf10a*<sup>-/-</sup> fish lack pectoral fins so it is important that pectoral fins are not included in the images when mutant fish are being compared to wild-type.

For quantification of RNA in situ data two macros were applied, one to set the RGB limits for the quantification ("Setting the RGB threshold limits"), and a second to quantify the area of staining ("Quantification of images from pre-set RGB threshold limits"). These are available as Supplementary Software 3 and Supplementary Software 4 respectively. Briefly, the RGB images were converted into three 8-bit grey scale images representing the red, green and blue channels and each pixel has a value between 0 and 255 based on its intensity in that channel. RGB colour thresholds simply set a maximum and minimum intensity for each of the red, green and blue channels, and then select all pixels which fall within the set ranges for all three channels (Supplementary Figure 13). This allows pixels of a specific colour to be automatically selected based on their RGB intensity values. For this analysis, strong and weak stainings were manually analysed to determine appropriate RGB colour threshold values which defined the area of the blue dye (oxidised BCIP) deposited during the staining procedure. These RGB thresholds were set for each experiment due to the inherent variations in enzymatic staining procedures, combined with differences in probe staining patterns, but remained constant during quantification to allow comparative analysis. Once manually determined by a trial-and-error procedure and visual confirmation, these values for each of the RGB channels are input to the first macro ("Setting the RGB threshold limits") which saves them to a temporary file. The second macro ("Quantification of images from pre-set RGB threshold limits") imports these RGB threshold values from the temporary files and quantifies the number of pixels within the wound area which fall within this RGB threshold. This macro creates a mask which can be manually adjusted to exclude any staining artefacts (eg two bubbles seen in the example below). The macro cycles through every image in the target folder and saves a table of staining area using the blinded code names for each file. The user must then use the key file to rename the files to the original designation.

For fluorescence quantification, the H<sub>2</sub>O<sub>2</sub> signal was quantified in Fiji using the "Wound-induced H<sub>2</sub>O<sub>2</sub> quantification macro" available as Supplementary Software 2. Briefly, the macro automatically detects the embryo outline, measures the mean fluorescent intensity within 50µm of the wound edge and the median fluorescence intensity from an area of trunk 1mm distal to the wound (Supplementary Figure 14). The median fluorescent intensity of the trunk is then subtracted from the mean fluorescent intensity of the wound to control for the basal oxidative state within each embryo. Fish were bathed in E3 medium supplemented with 10µM pentafluorobenzenesulfonyl fluorescein (PFBSF; Santa Cruz Biotechnology #sc-205429) and at 30 minutes post excision embryos were imaged under a Zeiss Axio Zoom V16 stereomicroscope with an

AxioCam MRm camera and Zen 2 (Blue Edition) software, 2-channel, brightfield & fluorescent (YFP filter: 489-505/516/524-546).

The Menger curvature was measured using `circumcircle.ijm`, an ImageJ macro kindly provided by Dave Mason, The Centre for Cell Imaging, University of Liverpool. To select each cell, a rectangle was drawn to indicate the distance of 600 $\mu\text{m}$  from the stump, and the closest cell that spanned the width of the notochord was selected for analysis (Supplementary Figure 15). If a cell membrane contacts other notochord cells, the cell membrane becomes bent and these cells cannot be used for analysis. To create a circumcircle, a triangle is made by selecting two points where the cell contacts the notochord sheath and one point on the cell membrane that is the furthest from the axis of these two points. If the circumcentre is anterior to the cell membrane, then the resulting measurement remained positive, if the circumcentre falls posterior to the cell membrane then the curvature is set to negative. This macro is available here: [<https://bitbucket.org/davemason/threepointcircumcircle>]. An adapted version, "Circumcircle", is available as Supplementary Software 5.

For the trunk contraction measurements, fish were imaged immediately prior to tail excision, incubated individually for a further two hours and imaged again. After blinding, the Measure function of ImageJ was used to determine the contraction of along a distance of approximately eight somites using the positions of somite boundaries and pigment cells as a reference (Supplementary Figure 16). The distance was measured in parallel to the notochord sheath using the rectangle drawing tool.

Quantification of proliferation was done as follows: Fish were stained with Phospho-Histone H3 (ser10) antibody (ThermoFisher) followed by goat anti-rabbit Alexa 488 (green) and imaging was done on an Olympus FV100 microscope. Maximum intensity projections were quantified in Perkin Elmer Volocity software by counting all points greater than 50 $\mu\text{m}^2$  in size and within 500 $\mu\text{m}$  of the caudal end.

### **RNA in situ method and probe information**

RNA in situ analysis was done using published protocols and PCR generated probes<sup>50</sup>. Sequences of the probes used in this study are in Supplementary Table 1.

### **Data Availability**

The authors declare that all data supporting the findings of this study are available within the article and its supplementary information files or from the corresponding author upon reasonable request.

### **References**

1. Gemberling M, Bailey TJ, Hyde DR, Poss KD. The zebrafish as a model for complex tissue regeneration. *Trends in genetics : TIG* **29**, 611-620 (2013).

2. Tanaka EM, Reddien PW. The cellular basis for animal regeneration. *Developmental cell* **21**, 172-185 (2011).
3. Niethammer P, Grabher C, Look AT, Mitchison TJ. A tissue-scale gradient of hydrogen peroxide mediates rapid wound detection in zebrafish. *Nature* **459**, 996-999 (2009).
4. Holmstrom KM, Finkel T. Cellular mechanisms and physiological consequences of redox-dependent signalling. *Nat Rev Mol Cell Biol* **15**, 411-421 (2014).
5. Funato Y, Miki H. Redox regulation of Wnt signalling via nucleoredoxin. *Free Radic Res* **44**, 379-388 (2010).
6. Ichijo H, *et al.* Induction of apoptosis by ASK1, a mammalian MAPKKK that activates SAPK/JNK and p38 signaling pathways. *Science* **275**, 90-94 (1997).
7. Rieger S, Sagasti A. Hydrogen peroxide promotes injury-induced peripheral sensory axon regeneration in the zebrafish skin. *PLoS biology* **9**, e1000621 (2011).
8. Yoo SK, Freisinger CM, LeBert DC, Huttenlocher A. Early redox, Src family kinase, and calcium signaling integrate wound responses and tissue regeneration in zebrafish. *The Journal of cell biology* **199**, 225-234 (2012).
9. Gauron C, *et al.* Sustained production of ROS triggers compensatory proliferation and is required for regeneration to proceed. *Scientific reports* **3**, 2084 (2013).
10. Han P, *et al.* Hydrogen peroxide primes heart regeneration with a derepression mechanism. *Cell research* **24**, 1091-1107 (2014).
11. Love NR, *et al.* Amputation-induced reactive oxygen species are required for successful *Xenopus* tadpole tail regeneration. *Nature cell biology* **15**, 222-228 (2013).
12. Nacu E, Tanaka EM. Limb regeneration: a new development? *Annual review of cell and developmental biology* **27**, 409-440 (2011).
13. Wehner D, Weidinger G. Signaling networks organizing regenerative growth of the zebrafish fin. *Trends in genetics : TIG* **31**, 336-343 (2015).
14. Rojas-Munoz A, *et al.* ErbB2 and ErbB3 regulate amputation-induced proliferation and migration during vertebrate regeneration. *Developmental biology* **327**, 177-190 (2009).
15. Kawakami A, Fukazawa T, Takeda H. Early fin primordia of zebrafish larvae regenerate by a similar growth control mechanism with adult regeneration. *Dev Dyn* **231**, 693-699 (2004).

16. Yoshinari N, Kawakami A. Mature and juvenile tissue models of regeneration in small fish species. *Biol Bull* **221**, 62-78 (2011).
17. Roehl HH. Linking wound response and inflammation to regeneration in the zebrafish larval fin. *Int J Dev Biol* **62**, 473-477 (2018).
18. Mathew LK, *et al.* Comparative expression profiling reveals an essential role for raldh2 in epimorphic regeneration. *J Biol Chem* **284**, 33642-33653 (2009).
19. Whitehead GG, Makino S, Lien CL, Keating MT. fgf20 is essential for initiating zebrafish fin regeneration. *Science* **310**, 1957-1960 (2005).
20. Norton WH, Ledin J, Grandel H, Neumann CJ. HSPG synthesis by zebrafish Ext2 and Extl3 is required for Fgf10 signalling during limb development. *Development* **132**, 4963-4973 (2005).
21. Roehl H, Nusslein-Volhard C. Zebrafish *pea3* and *erm* are general targets of FGF8 signaling. *Curr Biol* **11**, 503-507 (2001).
22. Yin A, Korzh S, Winata CL, Korzh V, Gong Z. Wnt signaling is required for early development of zebrafish swimbladder. *PLoS One* **6**, e18431 (2011).
23. Stoick-Cooper CL, *et al.* Distinct Wnt signaling pathways have opposing roles in appendage regeneration. *Development* **134**, 479-489 (2007).
24. Felber K, Elks PM, Lecca M, Roehl HH. Expression of osterix Is Regulated by FGF and Wnt/beta-Catenin Signalling during Osteoblast Differentiation. *PLoS One* **10**, e0144982 (2015).
25. Wolff C, Roy S, Ingham PW. Multiple muscle cell identities induced by distinct levels and timing of hedgehog activity in the zebrafish embryo. *Curr Biol* **13**, 1169-1181 (2003).
26. Pan S, *et al.* Discovery of NVP-LDE225, a Potent and Selective Smoothened Antagonist. *ACS medicinal chemistry letters* **1**, 130-134 (2010).
27. Li Y, Trush MA. Diphenyleneiodonium, an NAD(P)H oxidase inhibitor, also potently inhibits mitochondrial reactive oxygen species production. *Biochem Biophys Res Commun* **253**, 295-299 (1998).
28. Yoo SK, Starnes TW, Deng Q, Huttenlocher A. Lyn is a redox sensor that mediates leukocyte wound attraction in vivo. *Nature* **480**, 109-112 (2011).

29. Martin BL, Kimelman D. Canonical Wnt signaling dynamically controls multiple stem cell fate decisions during vertebrate body formation. *Developmental cell* **22**, 223-232 (2012).
30. Wilson V, Olivera-Martinez I, Storey KG. Stem cells, signals and vertebrate body axis extension. *Development* **136**, 1591-1604 (2009).
31. Cunningham TJ, Kumar S, Yamaguchi TP, Duester G. Wnt8a and Wnt3a cooperate in the axial stem cell niche to promote mammalian body axis extension. *Dev Dyn* **244**, 797-807 (2015).
32. Zhao X, Duester G. Effect of retinoic acid signaling on Wnt/beta-catenin and FGF signaling during body axis extension. *Gene expression patterns : GEP* **9**, 430-435 (2009).
33. Varga ZM, *et al.* Zebrafish smoothed functions in ventral neural tube specification and axon tract formation. *Development* **128**, 3497-3509 (2001).
34. Mich JK, Chen JK. Hedgehog and retinoic acid signaling cooperate to promote motoneurogenesis in zebrafish. *Development* **138**, 5113-5119 (2011).
35. Heber-Katz E. Oxygen, Metabolism, and Regeneration: Lessons from Mice. *Trends Mol Med* **23**, 1024-1036 (2017).
36. Pfefferli C, Jazwinska A. The careg element reveals a common regulation of regeneration in the zebrafish myocardium and fin. *Nat Commun* **8**, 15151 (2017).
37. Taniguchi Y, Watanabe K, Mochii M. Notochord-derived hedgehog is essential for tail regeneration in *Xenopus* tadpole. *BMC developmental biology* **14**, 27 (2014).
38. Schnapp E, Kragl M, Rubin L, Tanaka EM. Hedgehog signaling controls dorsoventral patterning, blastema cell proliferation and cartilage induction during axolotl tail regeneration. *Development* **132**, 3243-3253 (2005).
39. Wang J, Cao J, Dickson AL, Poss KD. Epicardial regeneration is guided by cardiac outflow tract and Hedgehog signalling. *Nature* **522**, 226-230 (2015).
40. Singh BN, Doyle MJ, Weaver CV, Koyano-Nakagawa N, Garry DJ. Hedgehog and Wnt coordinate signaling in myogenic progenitors and regulate limb regeneration. *Developmental biology* **371**, 23-34 (2012).
41. Meda F, Gauron C, Rampon C, Teillon J, Volovitch M, Vriza S. Nerves Control Redox Levels in Mature Tissues Through Schwann Cells and Hedgehog Signaling. *Antioxid Redox Signal* **24**, 299-311 (2016).



42. Mateus R, *et al.* In vivo cell and tissue dynamics underlying zebrafish fin fold regeneration. *PLoS One* **7**, e51766 (2012).
43. Bement WM, Mandato CA, Kirsch MN. Wound-induced assembly and closure of an actomyosin purse string in *Xenopus* oocytes. *Curr Biol* **9**, 579-587 (1999).
44. Xu S, Chisholm AD. *C. elegans* epidermal wounding induces a mitochondrial ROS burst that promotes wound repair. *Developmental cell* **31**, 48-60 (2014).
45. LeBert D, *et al.* Damage-induced reactive oxygen species regulate vimentin and dynamic collagen-based projections to mediate wound repair. *Elife* **7**, (2018).
46. Iliev AI, *et al.* Rapid microtubule bundling and stabilization by the *Streptococcus pneumoniae* neurotoxin pneumolysin in a cholesterol-dependent, non-lytic and Src-kinase dependent manner inhibits intracellular trafficking. *Mol Microbiol* **71**, 461-477 (2009).
47. Katagiri K, Katagiri T, Kajiyama K, Yamamoto T, Yoshida T. Tyrosine-phosphorylation of tubulin during monocytic differentiation of HL-60 cells. *J Immunol* **150**, 585-593 (1993).
48. Marie-Cardine A, Kirchgessner H, Eckerskorn C, Meuer SC, Schraven B. Human T lymphocyte activation induces tyrosine phosphorylation of alpha-tubulin and its association with the SH2 domain of the p59fyn protein tyrosine kinase. *Eur J Immunol* **25**, 3290-3297 (1995).
49. Nusslein-Volhard C, Dahm R. *Zebrafish*, first edn. Oxford University Press (2002).
50. Thisse B, Thisse C. In situ hybridization on whole-mount zebrafish embryos and young larvae. *Methods Mol Biol* **1211**, 53-67 (2014).

## End Notes

## Acknowledgements

The authors would like to thank the reviewers for their helpful comments. We would also like to acknowledge the assistance of staff from the Sheffield Zebrafish Aquaria and the Light Microscopy Facility. Supported by grants from Cancer Research UK (C11413/A12714) and Medical Research Council (MR/J001457/1) to HHR.

## Author Contributions

All authors conceived and performed the experiments, the manuscript was written by HHR with help from GM and MMGR.

## Competing Interest

The authors declare no conflict of interest.

## Figures

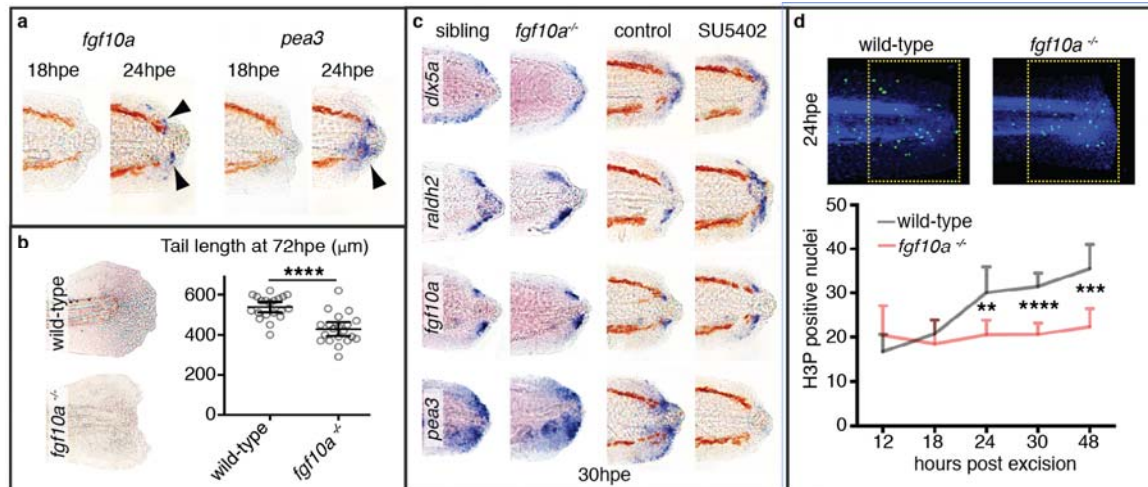

**Figure 1: FGF signalling is required for cell proliferation during larval tail regeneration.** **a** Arrowheads point to expression of the FGF ligand, *fgf10a*, and the downstream target, *pea3*, become evident by 24hpe (10/10 for both, number of experiments = 3). **b** *fgf10a*<sup>-/-</sup> fish have reduced tail regrowth compared to wild-type fish. Larvae were imaged at 72hpe. Tail length was determined using the Measure macro in ImageJ software by placing a rectangle parallel to the body that started at the anus and finished at the caudal end of the fin fold. Unpaired t test two-tailed results in  $P < 0.0001$  indicated as \*\*\*\* (sibling  $n = 20$ , *fgf10a*<sup>-/-</sup>  $n = 20$ , number of experiments = 3). **c** Expression of *dlx5a* and *raldh2* are not strongly affected when FGF signalling is reduced. SU5402 treatment was done from 26 hpe to 30hpe at 10 $\mu\text{M}$  concentration. This treatment is sufficient to abolish detection of the FGF downstream target *pea3* (10/10 for each panel, number of experiments = 2). **d** Whereas in wild-type fish DNA mitosis increases after tail excision, in *fgf10a*<sup>-/-</sup> fish mitosis remains constant (wildtype/12hpe  $n = 8$ , wildtype/18hpe  $n = 8$ , wildtype/24hpe  $n = 19$ , wildtype/30hpe  $n = 21$ , wildtype/48hpe  $n = 14$ , *fgf10a*<sup>-/-</sup>/12hpe  $n = 8$ , *fgf10a*<sup>-/-</sup>/18hpe  $n = 8$ , *fgf10a*<sup>-/-</sup>/24hpe  $n = 12$ , *fgf10a*<sup>-/-</sup>/30hpe  $n = 20$ , *fgf10a*<sup>-/-</sup>/48hpe  $n = 12$ , number of experiments = 2). Statistics done with ordinary one-way ANOVA (non-parametric) with multiple comparisons and Sidak hypothesis testing. \*\*\*\* indicates  $P < 0.0001$ , \*\*\*  $P = 0.0001$  and \*\*  $P = 0.005$ .

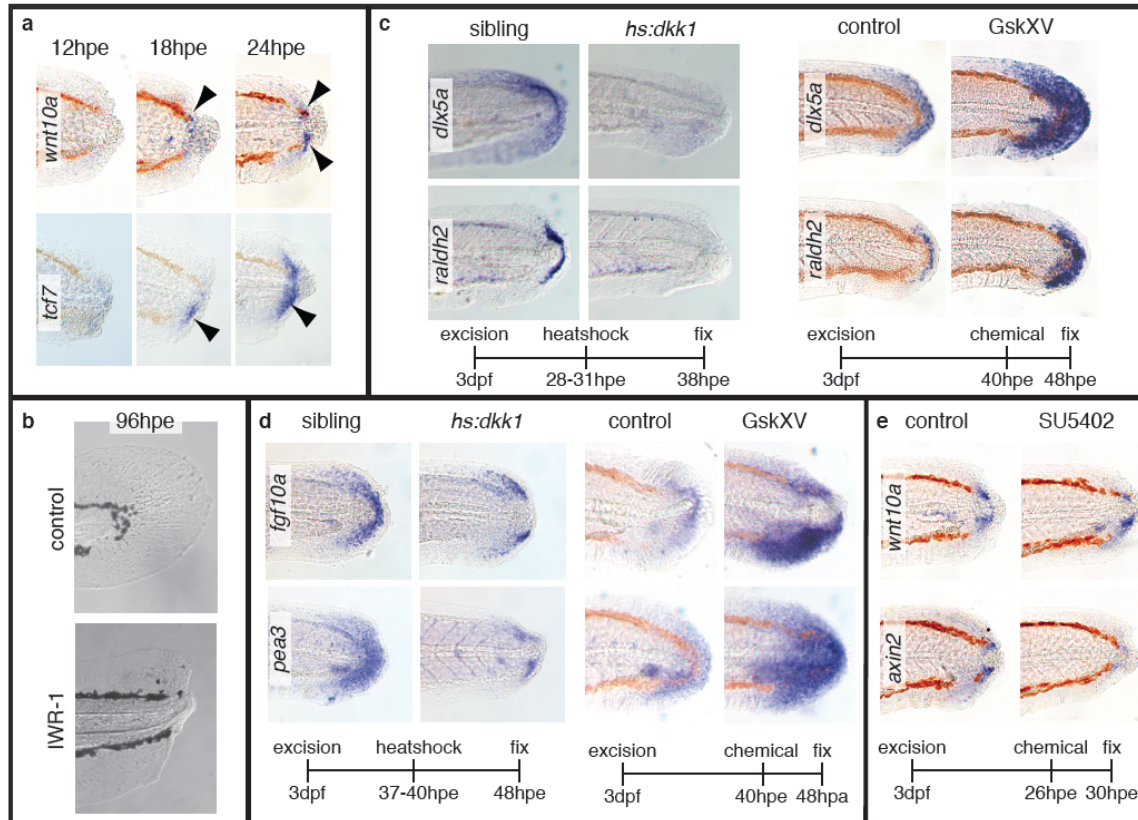

**Figure 2: Wnt/ $\beta$ -Catenin signalling is required for patterning during larval regeneration.** **a** Expression of the Wnt ligand, *wnt10a*, and the downstream target, *tcf7*, become evident by 18hpe (arrowheads) (*wnt10a*/18hpe 7/8, *wnt10a*/24hpe 10/10, *tcf7*/18hpe 9/10, *tcf7*/24hpe 10/10, number of experiments = 2). **b** Larvae treated with 10 $\mu$ M IWR-1 continuously after excision show no signs of regeneration at 96hpe (10/10 number of experiments = 2). **c** Heterozygous *hs:dkk1* fish and their siblings were heatshocked by placing in an incubator at 39 $^{\circ}$ C and sorted based by fluorescence present in the transgenic line. Non-fluorescent fish served as control fish. The GskXV treatments were done at 10 $\mu$ M (*hs:dkk1/dlx5a* 10/10, *hs:dkk1/raldh2* 10/10, number of experiments = 2) (GskXV/*dlx5a* 10/10, GskXV/*raldh2* 10/10, number of experiments = 4). **d** Expression of *fgf10a* and *pea3* are down-regulated in *hs:dkk1* larvae (treatment as in panel c) and up-regulated in fish treated with 12.5 $\mu$ M GskXV (*hs:dkk1* 10/12 control, 28/30 transgenic, number of experiments = 2) (GskXV control 12/12, treated 11/12 number of experiments = 2). **e** Expression of the Wnt/ $\beta$ -Catenin target gene *axin2* is reduced in fish treated with 10 $\mu$ M SU5402 (12/12, number of experiments = 3).

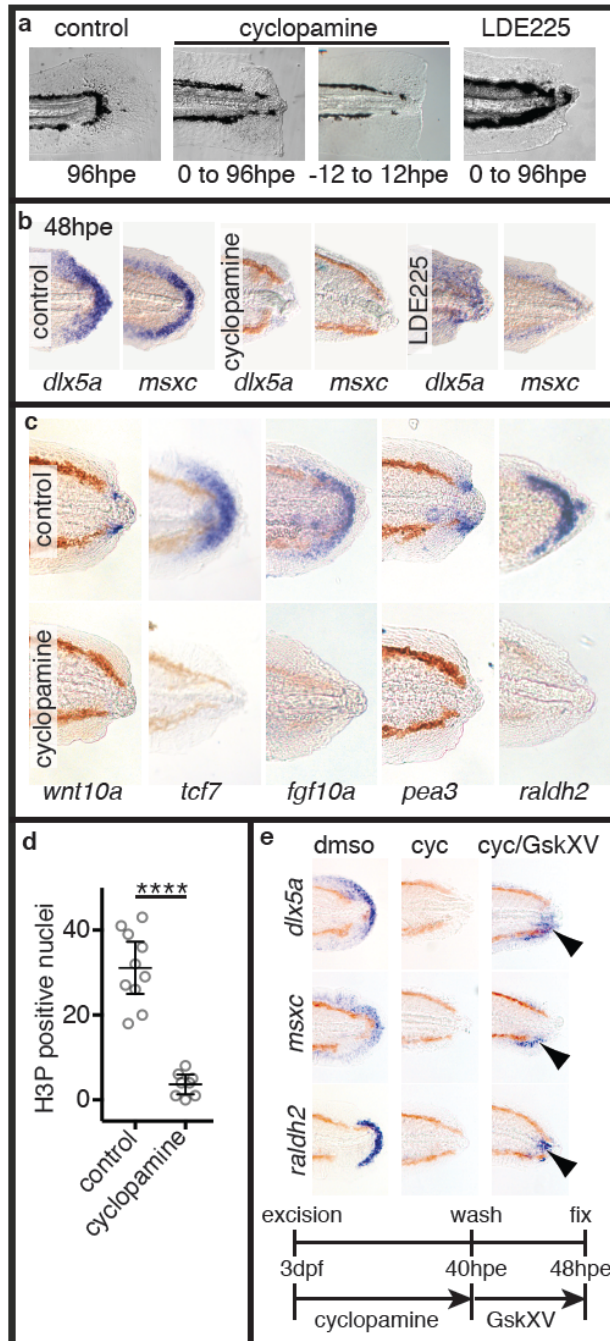

**Figure 3: Hedgehog signalling plays a central role during larval tail regeneration.** **a** Continuous treatment with the Hedgehog pathway inhibitors cyclopamine (20 $\mu$ M) and LDE225(20 $\mu$ M) blocks regeneration (Cyclopamine 10/10, LDE 10/10, number of experiments = 2) (Control 20/20, number of experiments = 4). Cyclopamine pulse treatment blocks regeneration (8/10, number of experiments = 2). **b** Larvae treated with cyclopamine (20 $\mu$ M) and LDE225 (20 $\mu$ M) from 0-48hpe have reduced expression of *dlx5a* and *msxc* (for all panels results are 10/10, number of experiments = 2). **c** Wound-induced expression of markers for the Wnt/ $\beta$ -Catenin, FGF and RA pathways is lost after treatment with cyclopamine. Larvae in the *wnt10a* and *pea3* panels were treated with 50 $\mu$ M cyclopamine from 0-30hpe. *tcf7*, *fgf10a* and *raldh2* panels were treated with 20 $\mu$ M cyclopamine from 0-48hpe (for all panels results are 10/10, number of experiments = 2). **d** Cell proliferation is inhibited by treatment with cyclopamine (control n = 10, cyclopamine n = 8, number of experiments = 2). This analysis was done as in Figure 1d. Unpaired t test two-tailed results in  $P < 0.0001$  indicated as \*\*\*\*. **e** Upregulation of Wnt/ $\beta$ -Catenin signalling after cyclopamine treatment restores

expression of *dlx5a*, *msxc* and *raldh2* (for all panels results are 10/10, number of experiments = 3). Arrowheads indicate partial rescue of marker expression. Larvae were treated from 0-40hpe with 50 $\mu$ M cyclopamine and then incubated in 10 $\mu$ M GskXV until fixation.

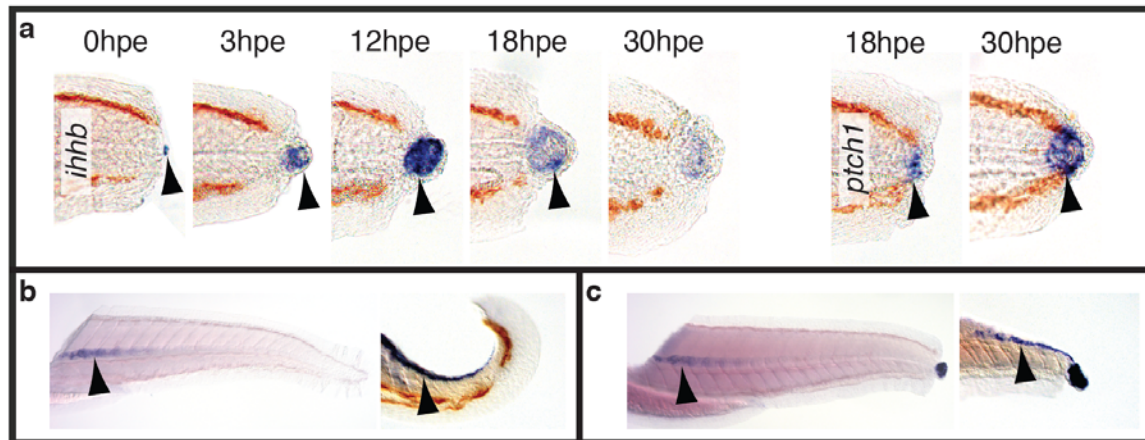

**Figure 4: The Hedgehog pathway is activated immediately after tail excision. a** *ihhb* expression is detected within the notochord bead and continues until 30hpe (0hpe 2/10, more than 8/10 for the other time points, number of experiments = 3). Expression of *ptch1* is upregulated by 18hpe and continues after 30hpe (10/10 for both time points, N = 2). Arrowheads point to expression domains. **b** Oblique and coronal sections reveal that *ihhb* is expressed in the notochord before (12/14, number of experiments = 2). **c** *ihhb* is expressed in the notochord after tail excision (7/7, number of experiments = 2).

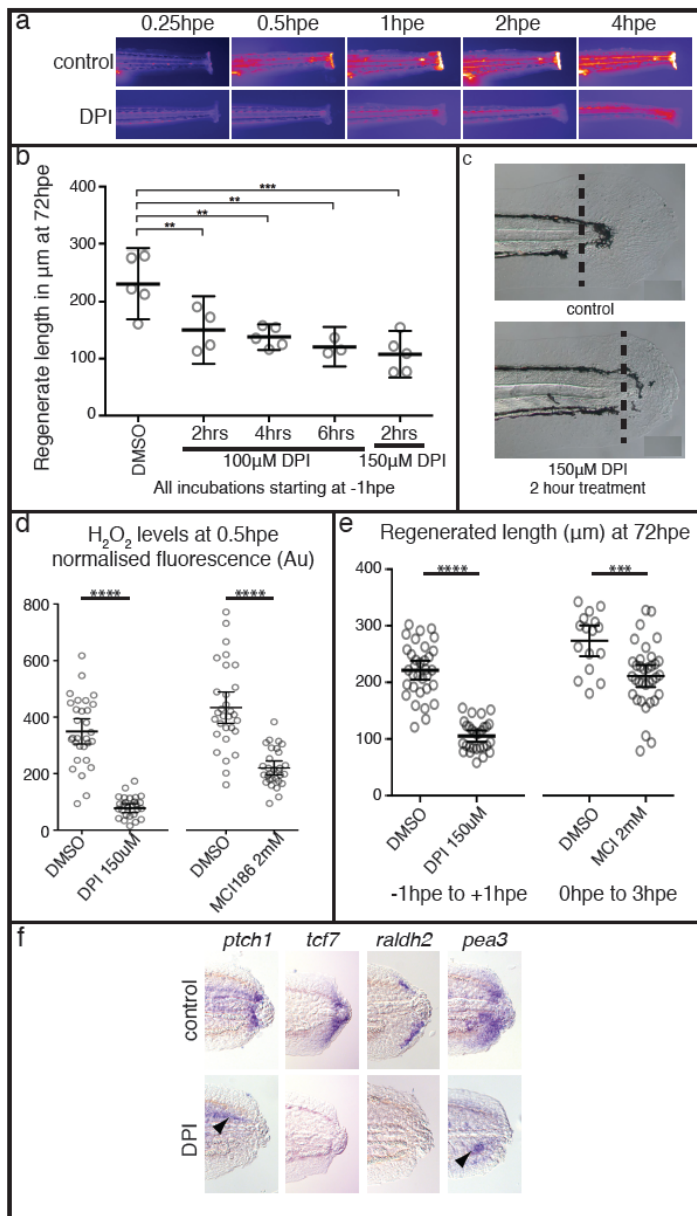

**Figure 5: ROS activity immediately after tail excision.** **a** Time course showing production of ROS after tail excision is reduced in larvae treated with 150 $\mu$ M DPI from 1 hour prior to excision. Larvae were bathed in 10 $\mu$ M PFBS-F (205429, Santa Cruz) to detect ROS. **b** Optimisation to show that treatment for as little as 2hrs (1hr pre-treatment and 1hr post-treatment) is sufficient to reduce tail regrowth by >50%. Regrowth was quantified from images using the Measure macro in ImageJ by placing a rectangle parallel to the body that started at the end of the notochord and finished at the caudal end of the fin fold. Significance was calculated using one-way ANOVA with Dunnett's multiple comparisons test and each sample compared to the DMSO control (DMSO n = 5; 100 $\mu$ M DPI/2hrs n= 4 and P = 0.0096; 100 $\mu$ M DPI/4hrs n= 5 and P = 0.0018; 100 $\mu$ M DPI/6hrs n= 3, P = 0.0015; 150 $\mu$ M DPI/2hrs n= 5, P = 0.0001; number of experiments = 1}. **c** Representative larval

tails showing the extent of tail regrowth after DPI treatment. **d** Quantification of PFBS-F fluorescence shows that DPI treatment has a stronger effect on ROS levels than MCI186. 30 larvae were analysed for each sample except for DPI which had only 29 (number of experiments = 2). \*\*\*\* indicates P < 0.0001. **e** Comparison of the efficacy of DPI to MCI186 in regards to regenerated tail length. Measurements were made as in panel a (DMSO n = 33, DPI n = 29, number of experiments = 3), (DMSO n = 16, MCI186 n = 33 number of experiments = 3). \*\*\*\* indicates P < 0.0001, \*\*\* indicates P = 0.005. **f** DPI treatment inhibits wound-induced activation of the Hedgehog, Wnt $\beta$ -Catenin, RA and FGF pathways. Larvae were pre-treated with 150  $\mu$ M DPI for one hour and for 6hpa in 100 $\mu$ M DPI. Larvae were then washed in E3 buffer and incubated until 24hpa or 48hpf in the case of *tcf7* (*ptch1* 19/19, *tcf7* 7/9, *raldh2* 13/19, *pea3* 9/9). Arrowheads point to

expression of *pea3* and *ptch1* that is found in unoperated animals (see also Supplementary Figure 2).

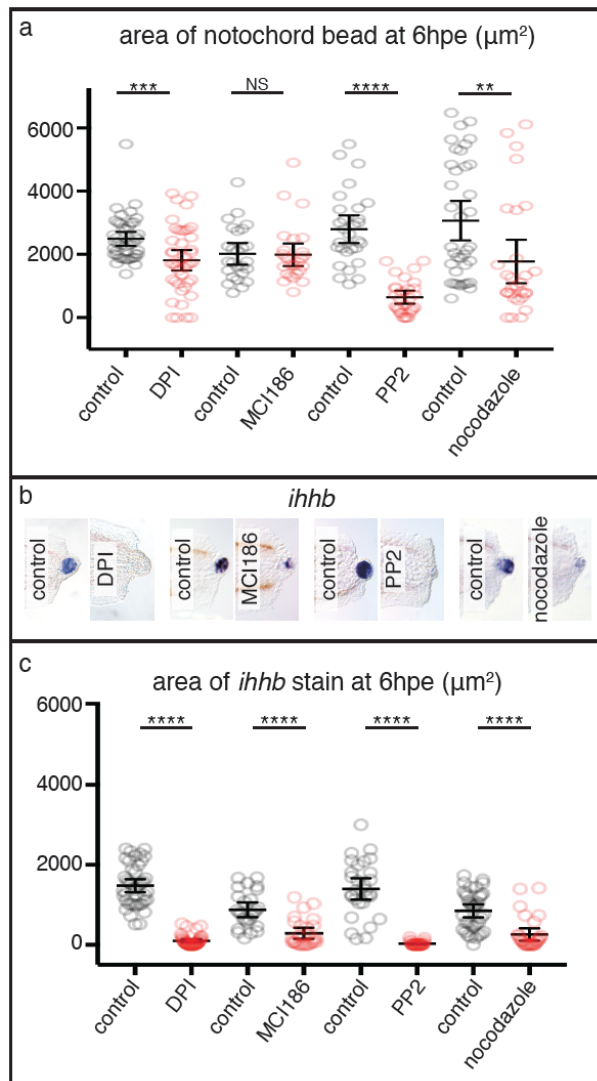

**Figure 6: DPI, MCI 186, PP2 and nocodazole affect notochord bead extrusion and *ihhb* expression.** **a** Bead extrusion is affected strongly by PP2 treatment and not by MCI 186 treatment. DPI and nocodazole have intermediate effects on extrusion (DMSO n = 42, DPI n = 43, number of experiments = 3) (DMSO n = 26, MCI186 n = 27, number of experiments = 3) (DMSO n = 29, PP2 n = 29, number of experiments = 3) (DMSO n = 37, nocodazole n = 29, number of experiments = 3). **b** Representative *ihhb* expression patterns after different treatments. **c** Quantification of *ihhb* stain from panel b shows that all treatments reduced the level of expression in the notochord bead. DPI (150 $\mu\text{M}$ ) treatment started at 1 hour prior to wounding and ended at 1hpa, after which larvae were washed in E3 buffer and incubated until 6hpe. MCI186 (2mM) treatment started at 0hpe and ended at 3hpe. PP2 (20  $\mu\text{M}$ ) treatment started at 1 hour prior to wounding and ended at 6hpe. Nocodazole (10  $\mu\text{g}/\text{mL}$ ) treatment started at 0hpe. Area of bead was quantified using the Measure function in ImageJ. Statistics shown are unpaired t test two-tailed with \*\*\*\* indicating  $P < 0.0001$ , \*\* indicating  $P = 0.0066$  and \*\*\* indicating  $P = 0.0008$ .



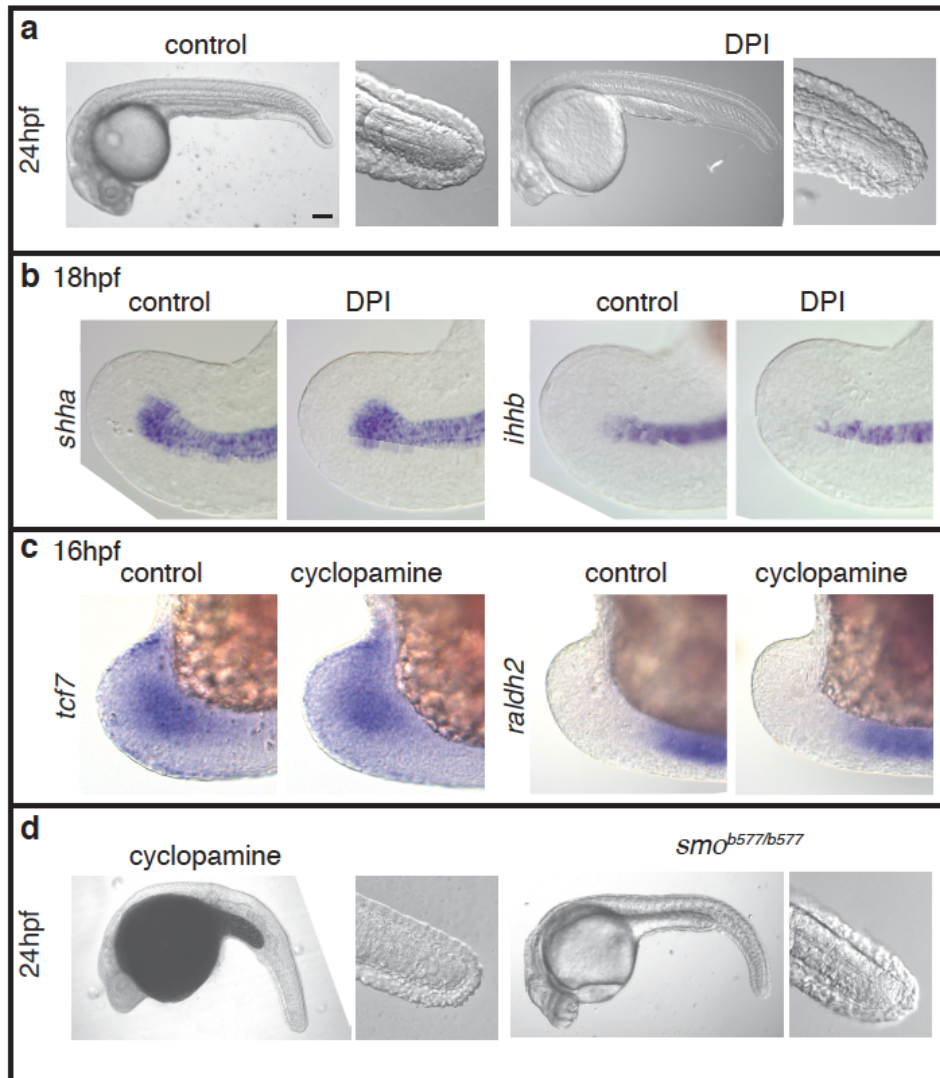

**Figure 7: ROS and Hedgehog signalling do not have similar roles during tail development.** **a** DPI treatment at 100 $\mu$ M from 14-24hpf does not affect larval tail morphology (10/10, number of experiments = 3). Scale bar is 200 $\mu$ m. **b** *shha* and *ihhb* expression in the tail is not affected by DPI treatment at 100 $\mu$ M from 14-18hpf (20/20 for all panels, number of experiments = 2). **c** *tcf7* and *raldh2* expression in the tail bud is not affected by treatment with 20 $\mu$ M cyclopamine from 8-16hpf (20/20 for all panels, number of experiments = 2). **d** Loss of Hedgehog signalling does not affect tail formation. Larvae were treated with 20 $\mu$ M cyclopamine from 8-10hpf (10/10, number of experiments = 2). Homozygous *smo*<sup>b577</sup> mutants (7/7, number of experiments = 2) lack zygotic Hedgehog signalling activity. Embryos were manually dechorionated prior to chemical treatment.

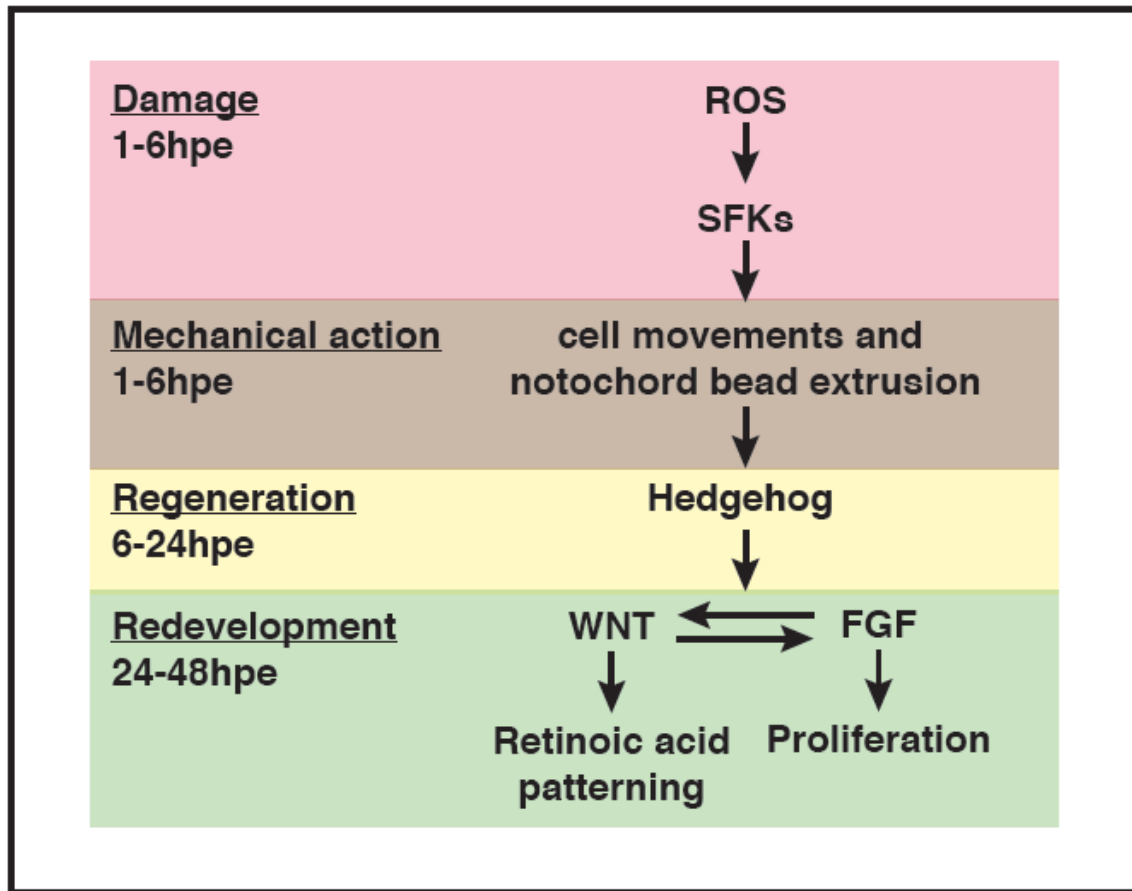

**Figure 8: A model for tail regeneration.** This figure summarises our model for zebrafish larval tail regeneration. On the left side are the different stages of this process with the approximate timing. Please see the text for further detail.
